# Supplementary material for: A Biginelli-based organic nanoprobe for simultaneous estimation of tyramine and 1,2-diaminopropane: application in real samples
Source: Royal Society of Chemistry journal article supplement (doi:10.1039/c6nj02196d), 2016-01-01
Supplement: c6nj02196d1.pdf [file c6nj02196d1.pdf]

## Supporting Information

### **Biginelli-based Organic Nanoprobe for Simultaneous Estimation of Tyramine and 1, 2-Diaminopropane: application in real samples.**

Gaganpreet Kaur,<sup>a</sup> Tilak Raj,<sup>b</sup> Navneet Kaur<sup>a,c\*</sup> and Narinder Singh<sup>b\*</sup>

<sup>a</sup>Centre for Nanoscience & Nanotechnology (UIEAST), Panjab University, Chandigarh, 160014, India. E-mail: navneetkaur@pu.ac.in; Tel: +91-1722534464

<sup>b</sup>Department of Chemistry, Indian Institute of Technology Ropar, Rupnagar, Punjab, India, 140001. E-mail: nsingh@iitrpr.ac.in; Fax: +91-1881223395; Tel: +91-1881242176.

<sup>c</sup>Department of Chemistry, Panjab University, Chandigarh, 160014, India. E-mail: navneetkaur@pu.ac.in

#### Table of contents

**Figure S1.** <sup>1</sup>H NMR spectrum of compound **1** and its expansion.

**Figure S2.** <sup>13</sup>C NMR spectrum of compound **1**.

**Figure S3.** ESI Mass spectrum of compound **1**.

**Figure S4.** Plot of variation in size of nanoparticles as a function of concentration of compound **1** in water.

**Figure S5.** Linear regression graph for Ag (I) titration.

**Figure S6.** Linear regression graphs for Tyramine titration (A) and linear regression graph for 1,2-Diaminopropane titration (B).

**Figure S7.** Non-linear regression graphs between Fluorescence Intensity vs. Concentrations of amines (at higher concentrations).

**Figure S8.** Fluorescence spectra of nano-aggregates **N1** at different concentrations of TBA perchlorate to evaluate the salt effect.

**Figure S9.** Fluorescence spectra of nano-aggregates **N1** at different pH values.

**Figure S10.** Fluorescence intensity v/s pH graphs of A) **N1.Ag(I)** complex with 50  $\mu\text{M}$  Tyramine and B) **N1.Ag(I)** complex with 50  $\mu\text{M}$  1,2-Diaminopropane.

**Figure S11.** Plot of fluorescence intensity ratios of **N1** and Ag (I) at different concentrations, as a function of time.

**Figure S12.** Stability of organic nanoparticles, **N1** and the **N1.Ag(I)** complex over a period of two weeks.

**Figure S13.** Fluorescence intensity variation of A) **N1** on addition of different metal ions and B) **N1.Ag(I)** on addition of different Biogenic amines using five different batches of sensors to check the reproducibility.

**Figure S14.** Fluorescence intensity variation of A) **N1** on addition of different metal ions and B) **N1.Ag(I)** on addition of different Biogenic amines in presence of HEPES buffer, pH 7.4.

**Figure S15.** Fluorescence intensity v/s wavelength graph of **N1.Ag(I)** complex with 50  $\mu\text{M}$  each of Tyramine and 50  $\mu\text{M}$  1, 2-Diaminopropane mixed together.

**Table S1:** Comparison of current sensor with existing literature.

GK-14

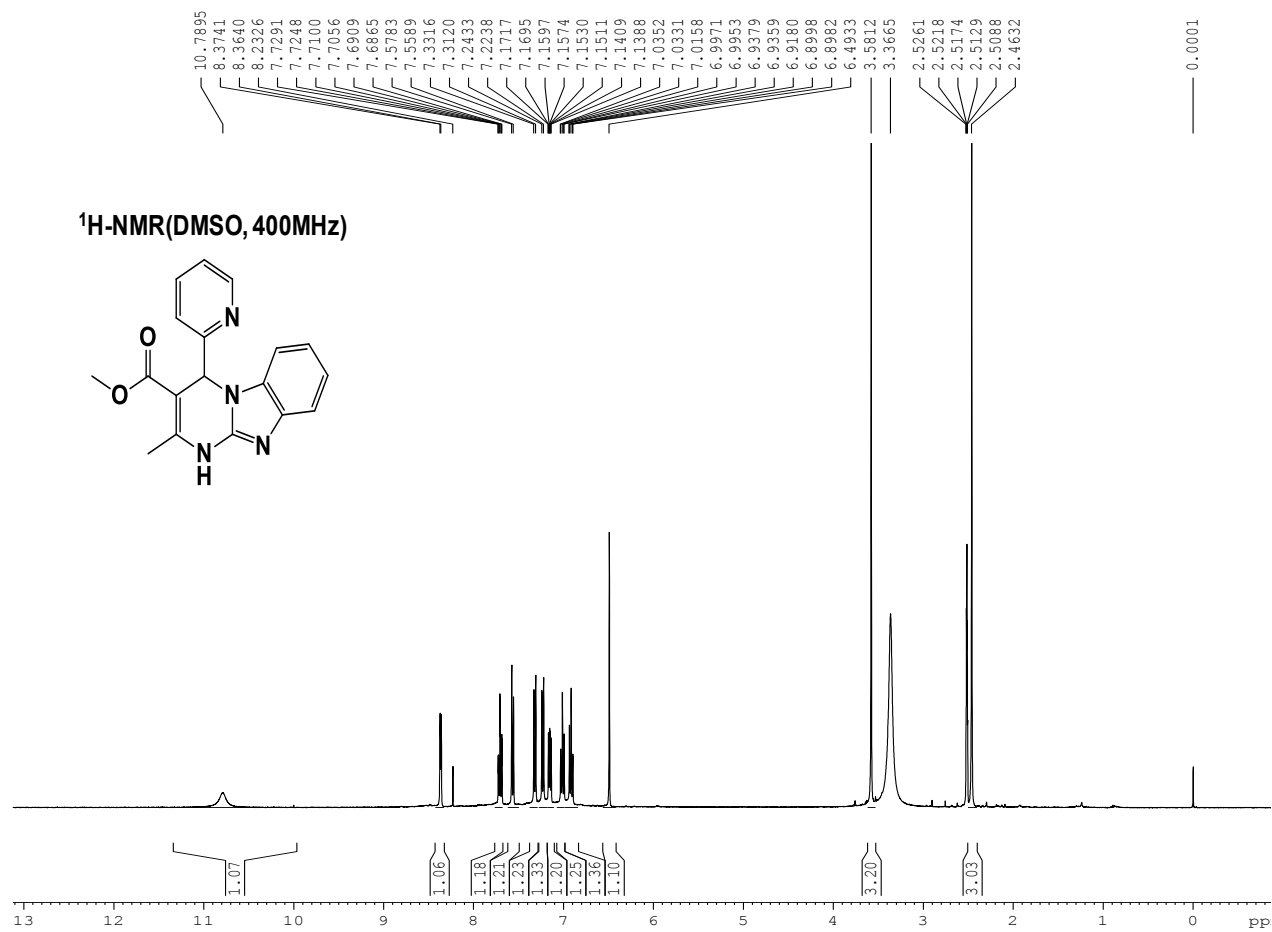

GK-14

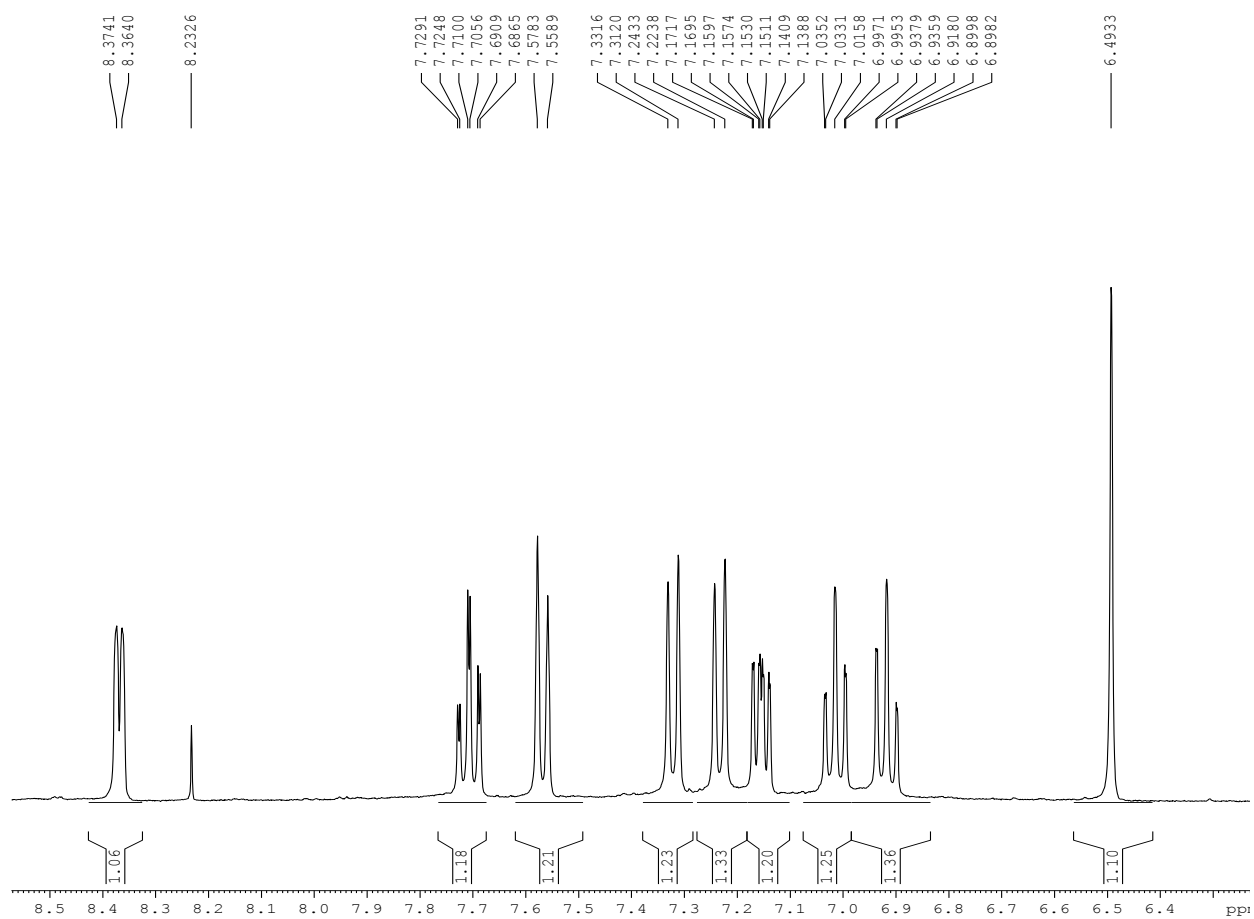

**Figure S1.**  $^1\text{H}$  NMR spectrum of compound **1** and its expansion.

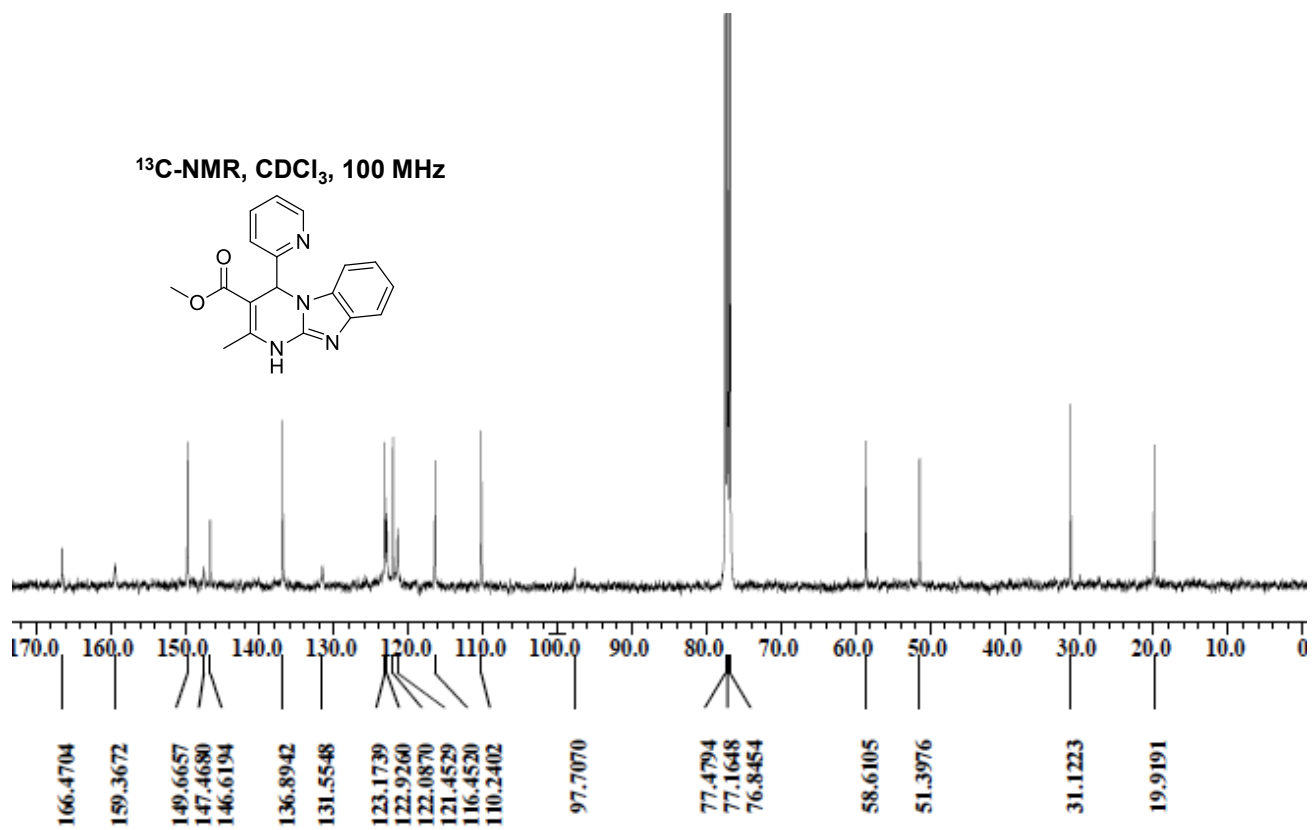

**Figure S2.**  $^{13}\text{C}$  NMR spectrum of compound 1.

GAGANPREET GK-14 13 (0.138) Cm (9:31)

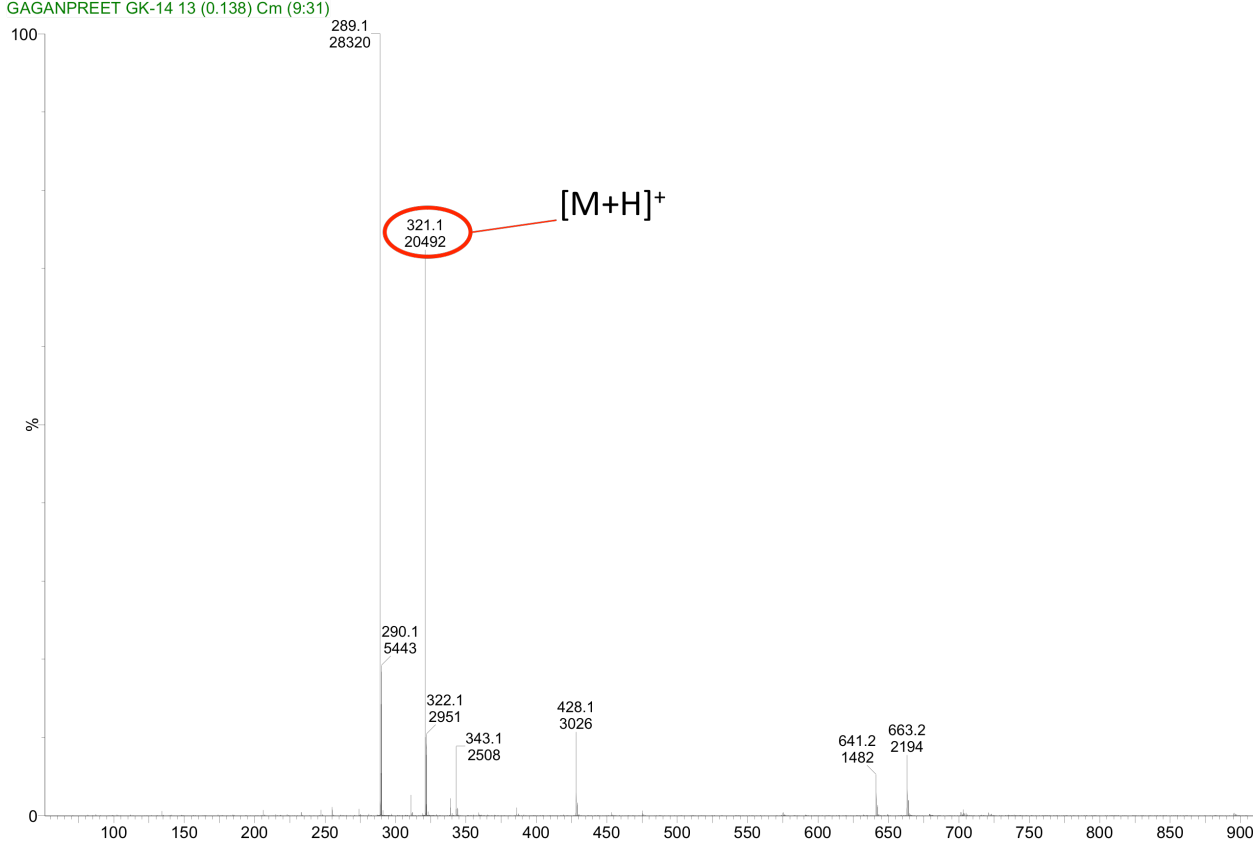

Figure S3. ESI Mass spectrum of compound 1.

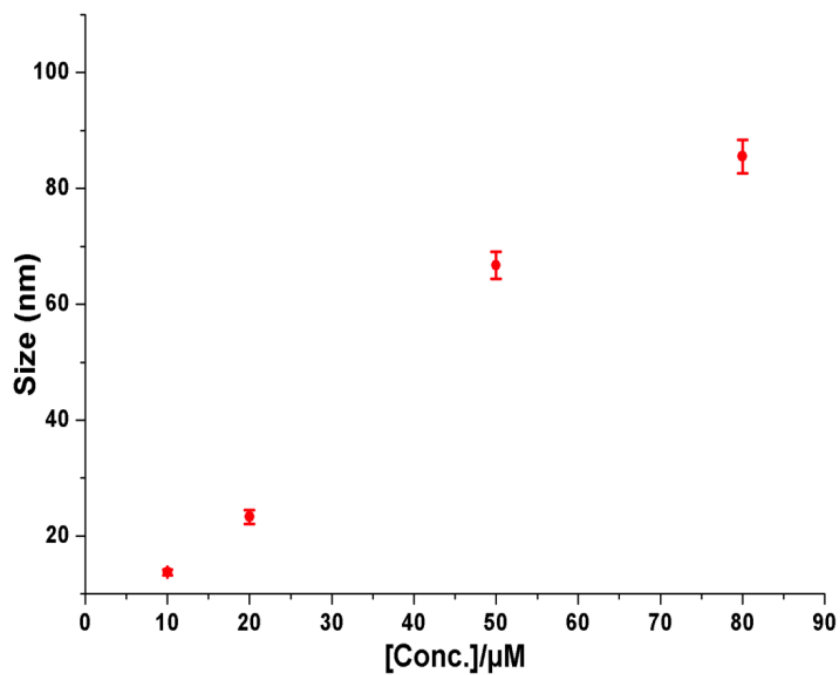

Figure S4. Plot of variation in size of nanoparticles as a function of concentration of compound 1 in water.

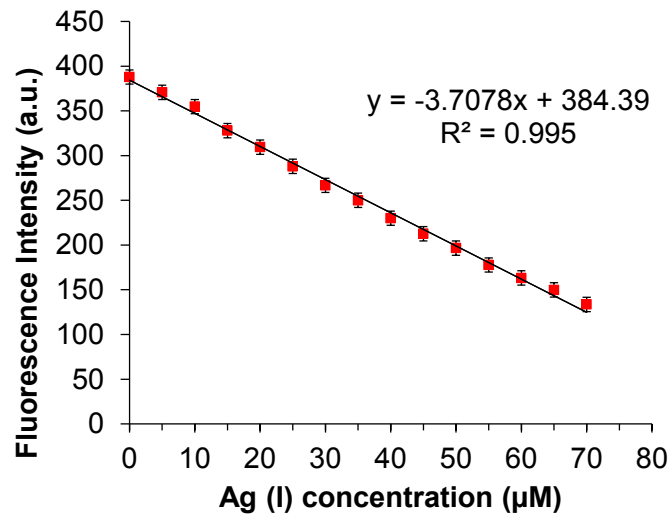

**Figure S5.** Linear regression graph for Ag (I) titration.

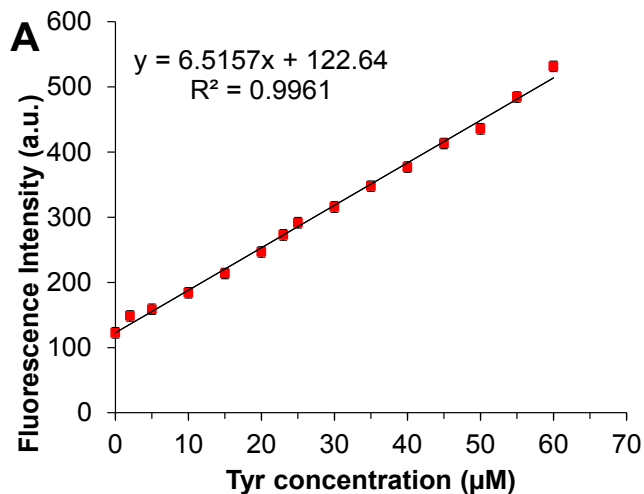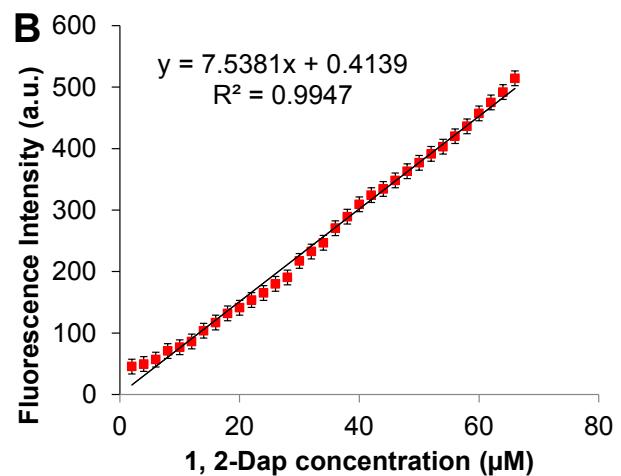

**Figure S6.** Linear regression graphs for Tyramine titration (A) and linear regression graph for 1,2-Diaminopropane titration (B).

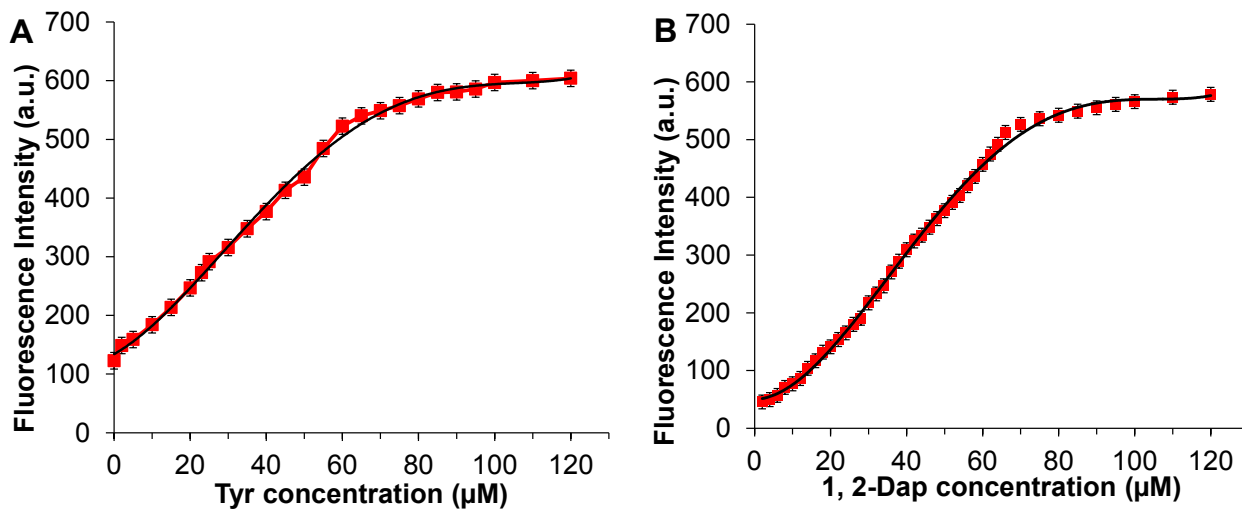

**Figure S7.** Non-linear regression graphs between Fluorescence Intensity vs. Concentrations of amines (at higher concentrations).

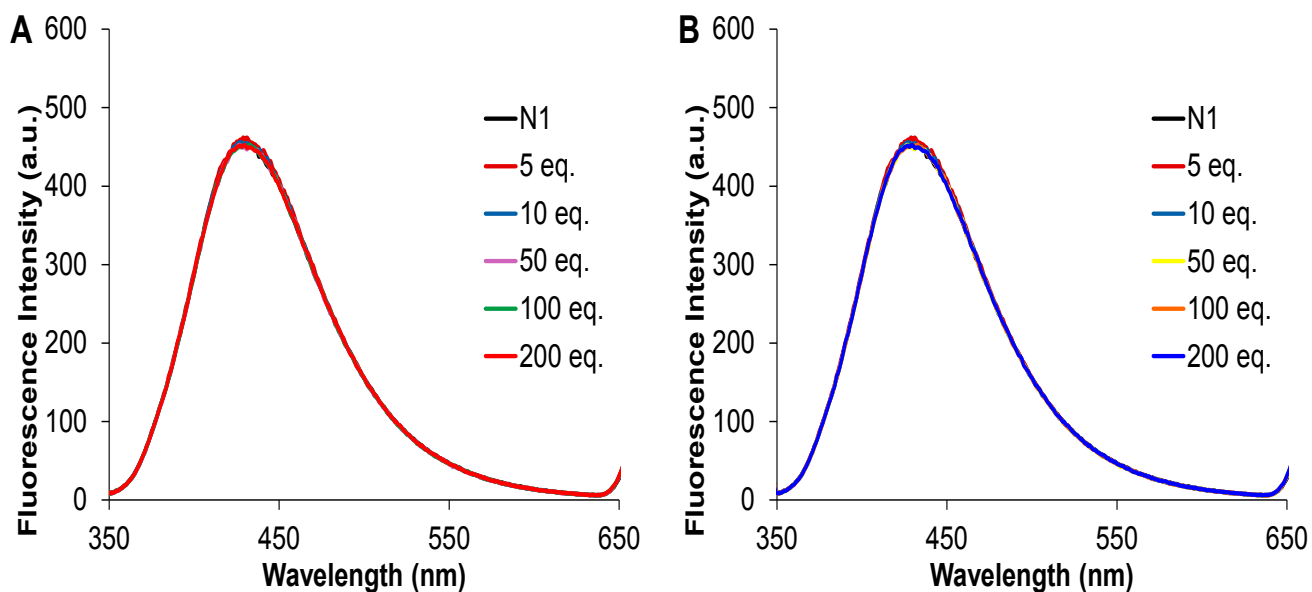

**Figure S8.** Fluorescence spectra of nano-aggregates N1 at different concentrations of (A) TBA perchlorate to evaluate the salt effect and (B) in presence of NaCl.



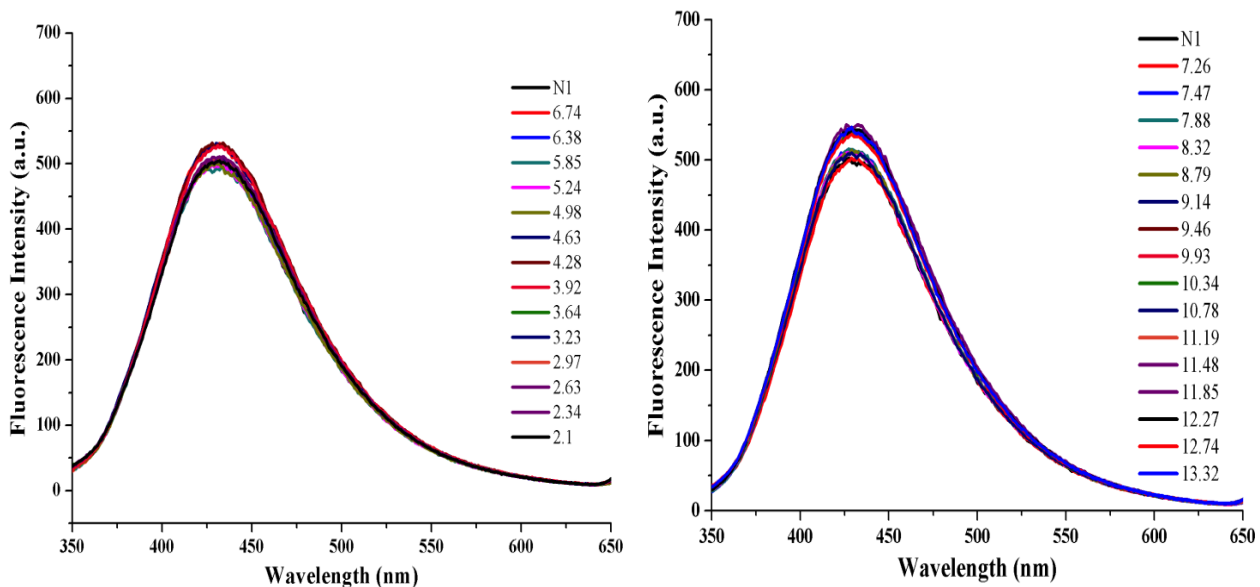

**Figure S9.** Fluorescence spectra of nano-aggregates N1 at different pH values.

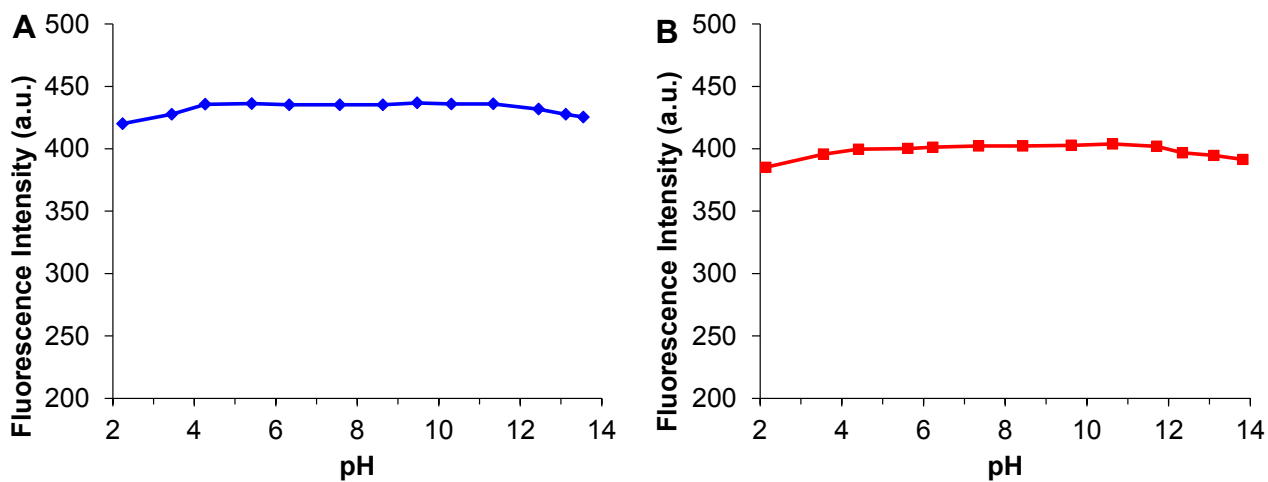

**Figure S10.** Fluorescence intensity v/s pH graphs of A) N1.Ag(I) complex with 50  $\mu$ M Tyramine and B) N1.Ag(I) complex with 50  $\mu$ M 1,2-Diaminopropane.

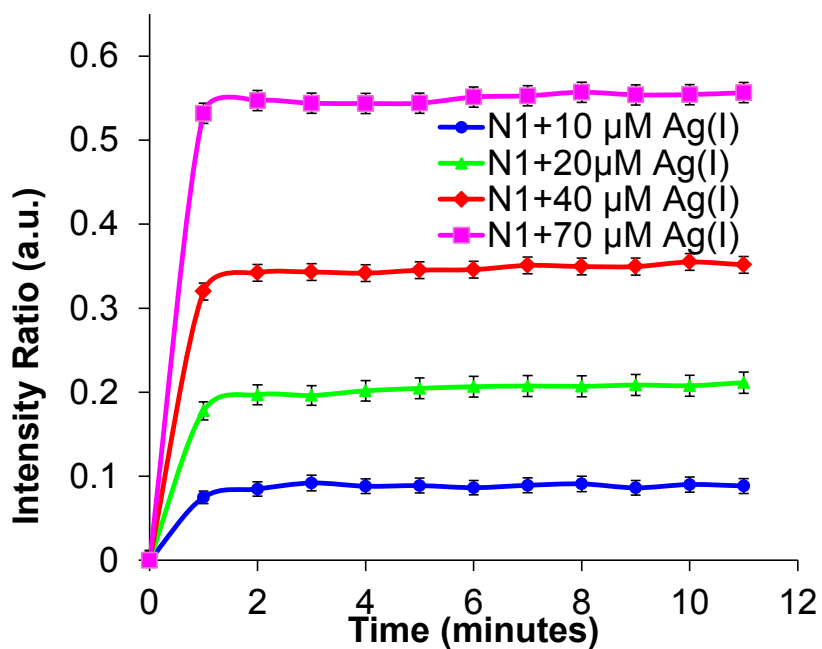

**Figure S11.** Plot of fluorescence intensity ratios of N1 and Ag (I) at different concentrations, as a function of time.

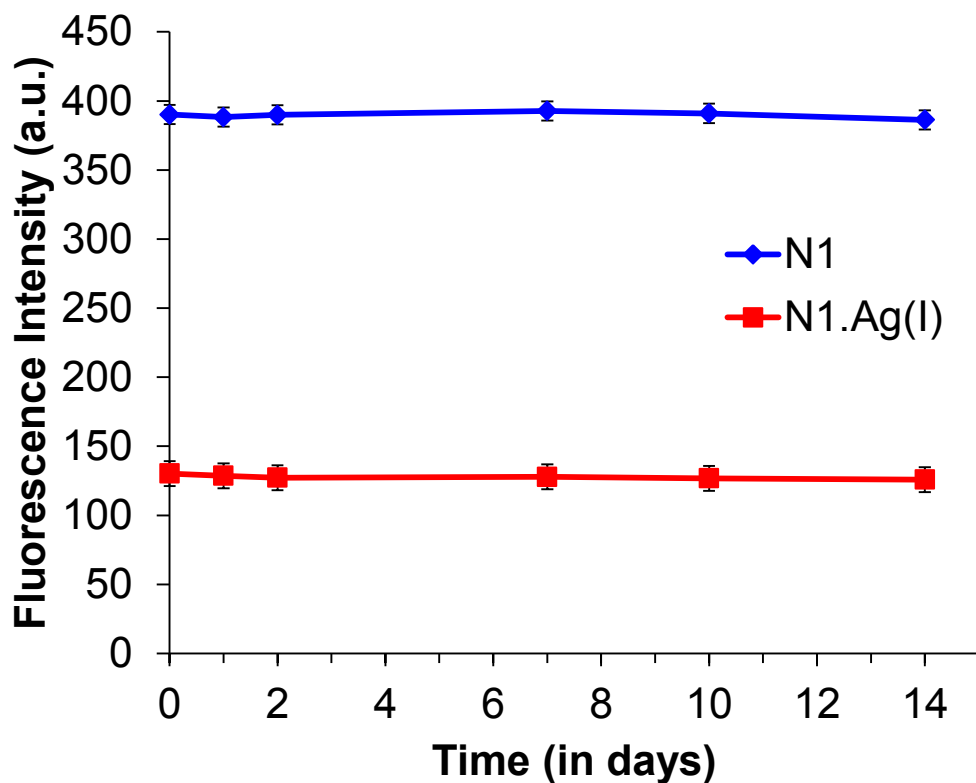

**Figure S12.** Stability of organic nanoparticles, N1 and the N1.Ag(I) complex over a period of two weeks.

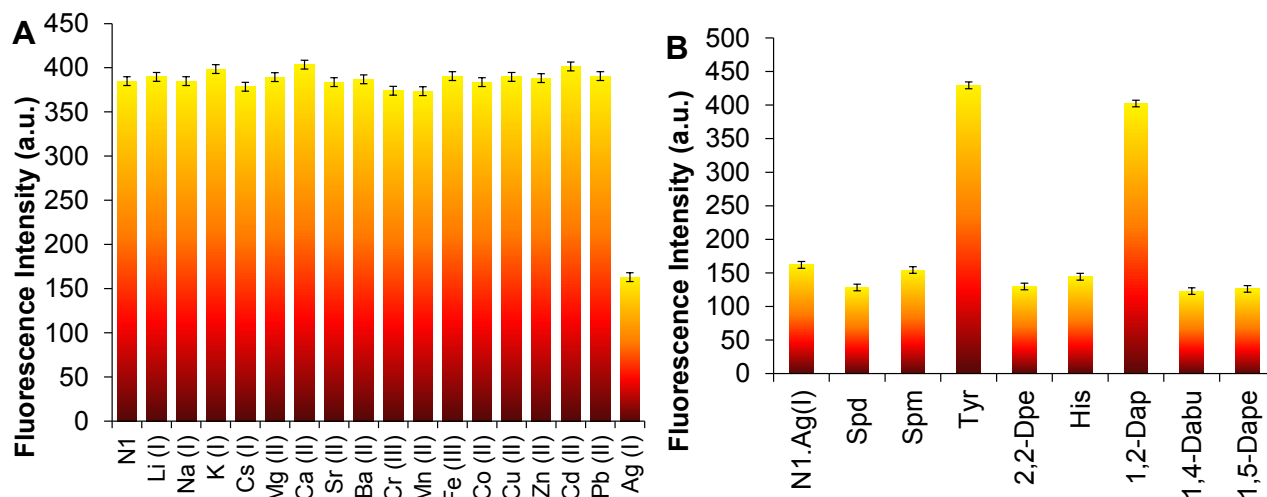

**Figure S13.** Fluorescence intensity variation of A) N1 on addition of different metal ions and B) N1.Ag(I) on addition of different Biogenic amines using five different batches of sensors to check the reproducibility.

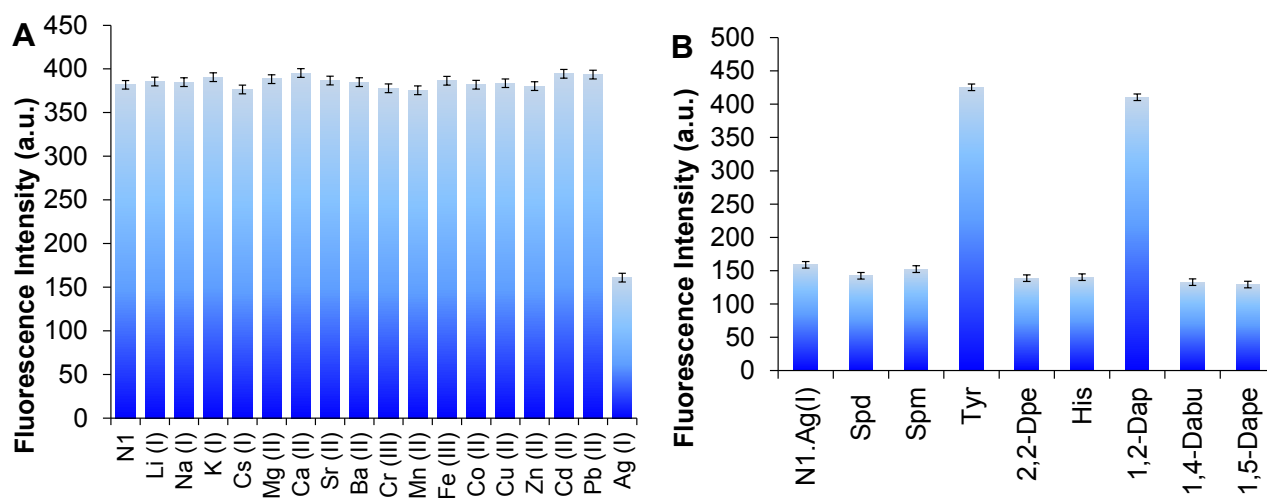

**Figure S14.** Fluorescence intensity variation of A) N1 on addition of different metal ions and B) N1.Ag(I) on addition of different Biogenic amines in presence of HEPES buffer, pH 7.4.

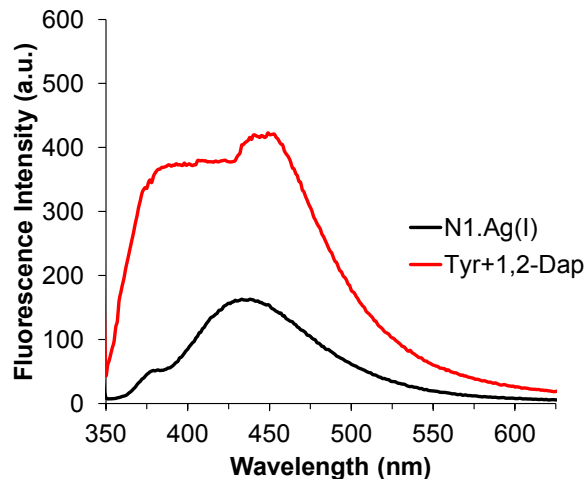

**Figure S15.** Fluorescence intensity v/s wavelength graph of **N1.Ag(I)** complex with 50  $\mu\text{M}$  each of Tyramine and 50  $\mu\text{M}$  1,2-Diaminopropane mixed together.

#### Determination of detection limit.

The detection limit (DL) of nano-aggregates of **1** for Ag (I) was determined from the following equation:

$$DL = \frac{KS_{b1}}{S}$$

Where  $K = 3$ ;  $S_{b1}$  is the standard deviation of the blank solution;  $S$  is the slope of the calibration curve. The detection limits of biogenic amines were also determined in a similar fashion.

**Table S1:** Comparison of current sensor with existing literature.

| S. No. | Mode of detection                                                     | Pretreatment          | Application to real sample analysis | Detection limit               | Reference                                                |
|--------|-----------------------------------------------------------------------|-----------------------|-------------------------------------|-------------------------------|----------------------------------------------------------|
| 1      | UV                                                                    | Pretreatment          | Urine                               | 0.06 $\mu\text{M}$            | <i>J. Sep. Sci.</i> , 2009, <b>32</b> , 4143–4147.       |
| 2      | Matrix -solid -phase-dispersion using HPLC –electrospray–tandem MS    | Pretreatment          | Cheese                              | 0.06 mg/kg                    | <i>J. Agric. Food Chem.</i> 2005, <b>53</b> , 3779–3783. |
| 3      | UHPLC-MS/MS                                                           | Pretreatment          | Anchovy (fish)                      | Range: 10–750 $\mu\text{g/L}$ | <i>J. Agric. Food Chem.</i> 2012, <b>60</b> , 5324–5329  |
| 4      | RP-HPLC coupled with fluorimetry                                      | precolumn dansylation | Wines                               | 0.04 mg/l                     | <i>Food Chem.</i> , 2008, <b>106</b> , 1218–1224         |
| 5      | Electrochemical sensor based on MWCNT-gold nanoparticle composites    | -                     | Yoghurt                             | 57 nM                         | <i>Food Res. Int.</i> , 2011, <b>44</b> , 276–281.       |
| 6      | Cyclic voltammetry using SWCNT                                        | Pretreatment          | Fish products                       | 0.62 $\mu\text{M}$            | <i>J. Food Eng.</i> , 2015, <b>149</b> , 1–8.            |
| 7      | Absorption-based Chromogenic Sensing on filter paper                  | -                     | -                                   | 0.02 mM                       | <i>Anal. Chem.</i> 2010, <b>82</b> , 8402-8405           |
| 8      | Chameleon dye based, microtitre plate using fluorescence spectroscopy | Pretreatment          | Fish samples                        | 3.4 $\mu\text{M}$             | <i>Analyst</i> , 2011, <b>136</b> , 4492–4499            |
| 9      | Micellar liquid chromatography and pulsed amperometric                | -                     | Wine                                | 12ng/ml                       | <i>J. Chromatogr. A</i> , 2007, <b>1156</b> , 288–295.   |
| 10     | Amperometry                                                           | Pretreatment          | Sauerkraut                          | 0.57 $\mu\text{M}$            | <i>Sens. Actuators B</i> , 2013, <b>178</b> , 40– 46     |
| 11     | Fluorescence Spectroscopy-using easily-engineered nanomaterials       | No                    | Milk and Wine                       | 3.91 nM                       | Current study.                                           |
